# Supplementary material for: Effects of an electrospun Janus structure on enhanced UV resistance performance
Source: Royal Society of Chemistry journal article supplement (doi:10.1039/d4nr03948c), 2025-01-01
Supplement: d4nr03948c1.pdf [file d4nr03948c1.pdf]

# Supporting Information

## Effects of Electrospun Janus Structure on An Enhanced UV Resistance

### Performance

Bingying Chen, Junli Guo, Chen Chen, Yueling Shen, Yaoyao Yang\*, and DengGuang Yu\*

*School of Materials and Chemistry, University of Shanghai for Science and Technology, 516 Jungong Road, Shanghai 200093, China.†*

\* Yaoyao Yang: [yuyang@usst.edu.cn](mailto:yuyang@usst.edu.cn)

\* Dengguang Yu: [ydg017@usst.edu.cn](mailto:ydg017@usst.edu.cn)

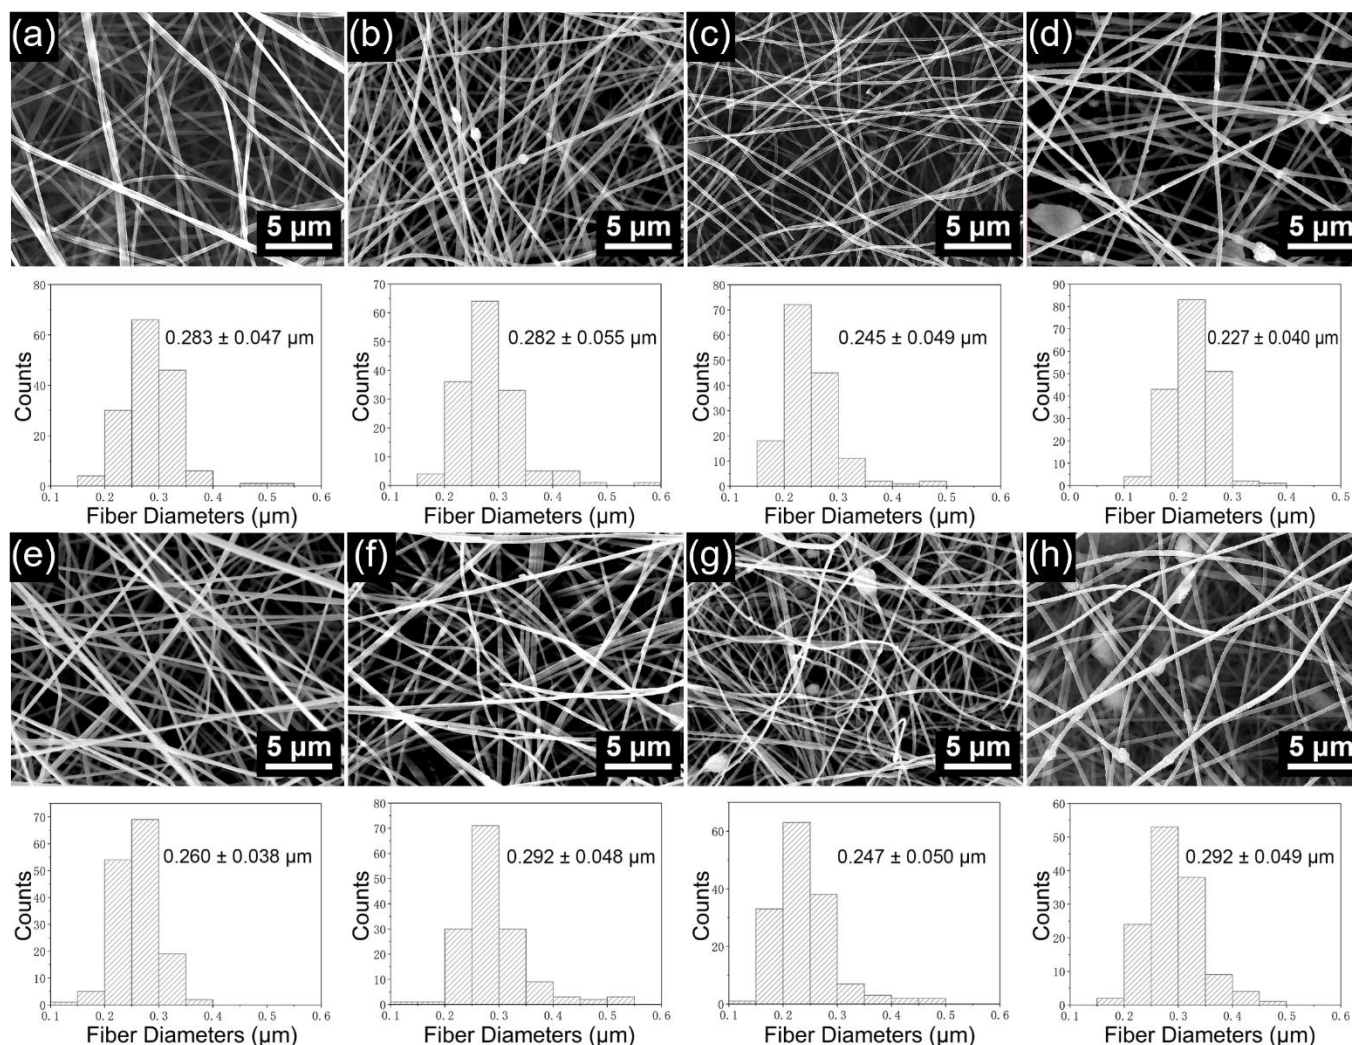

**Fig. S1.** SEM images and diameter distributions of membranes with 0, 1, 5, 10 wt% content of TiO<sub>2</sub>:

(a, b, c, d) Px membrane; (e, f, g, h) Px-6h membrane.

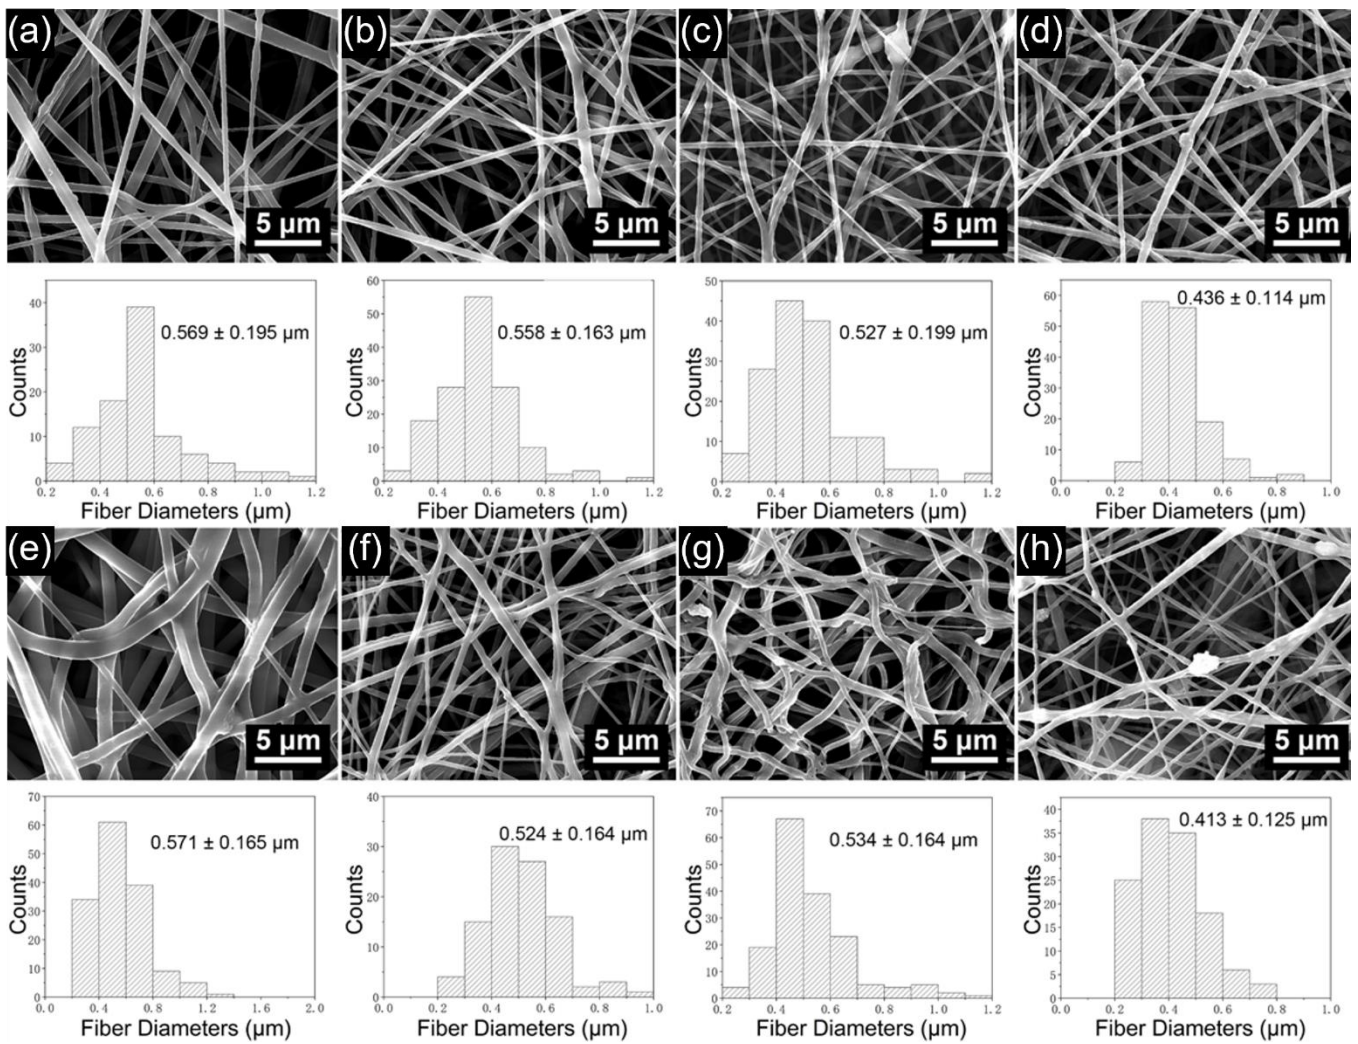

**Fig. S2.** SEM images and diameter distributions of membranes with 0,1,5,10 wt% content of  $\text{TiO}_2$ :

(a,b,c,d) Tm membrane; (e,f,g,h) Tm-6h membrane.

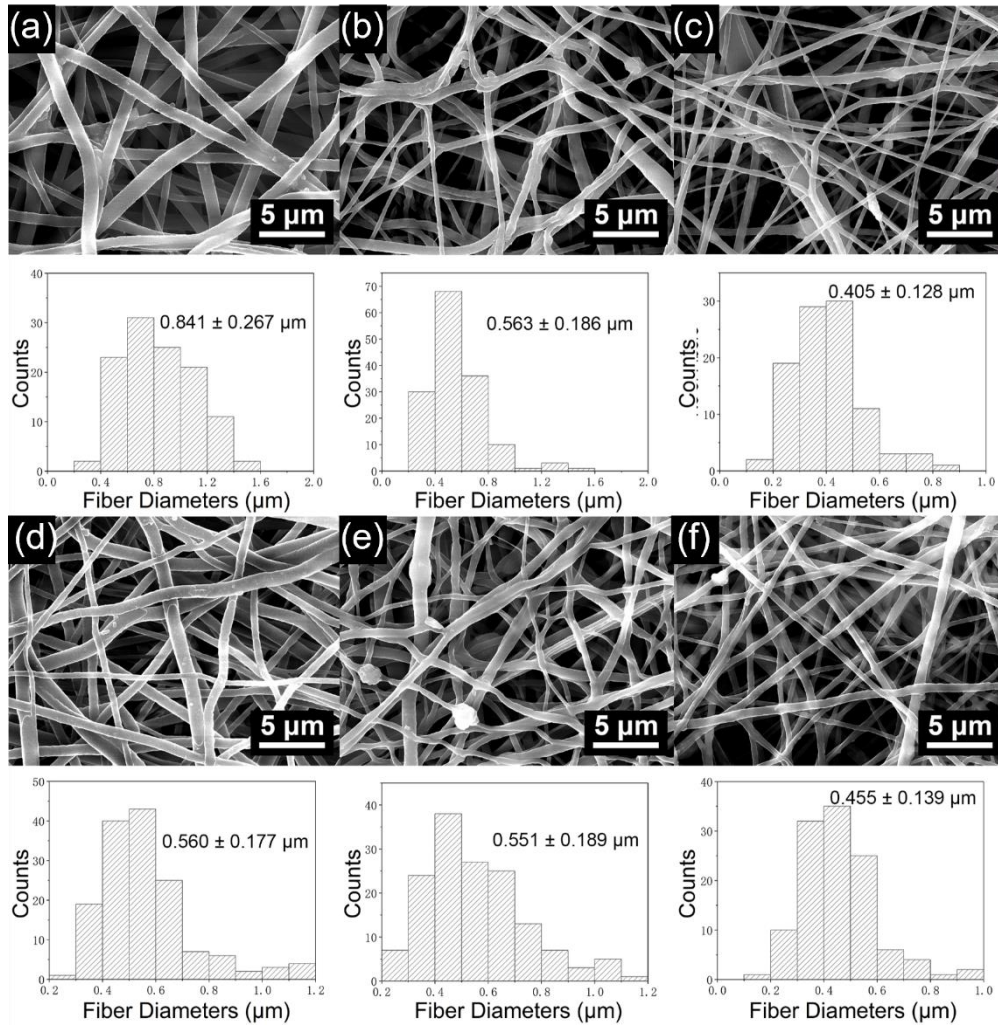

**Fig. S3.** SEM images and diameter distributions of membranes with 1,5,10 wt% content of  $\text{TiO}_2$ :

(a,b,c) Tn//TPU membrane; (d,e,f) Tn//TPU-6h membrane.

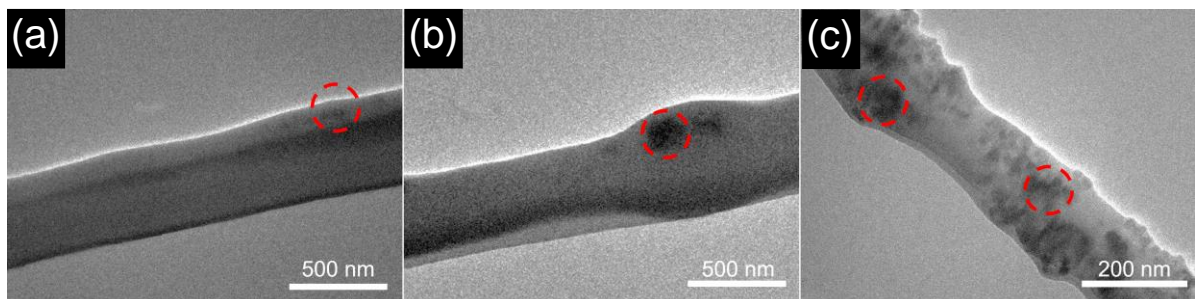

**Fig. S4.** (a, b, c) TEM images of Tn//TPU with 1,5,10 wt% content of  $\text{TiO}_2$ . The scale bar is 500 nm.

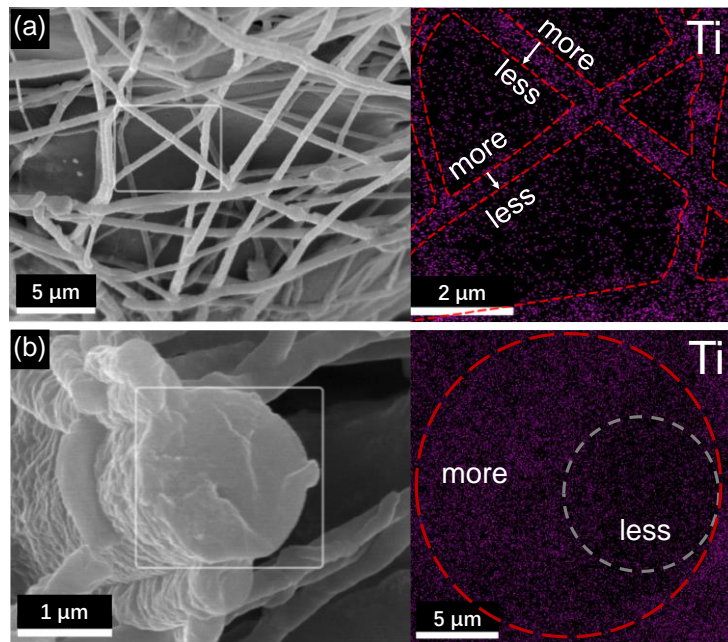

Fig. S5. EDS spectra of P1//TPU nanofibers: (a) surface and (b) cross-section.

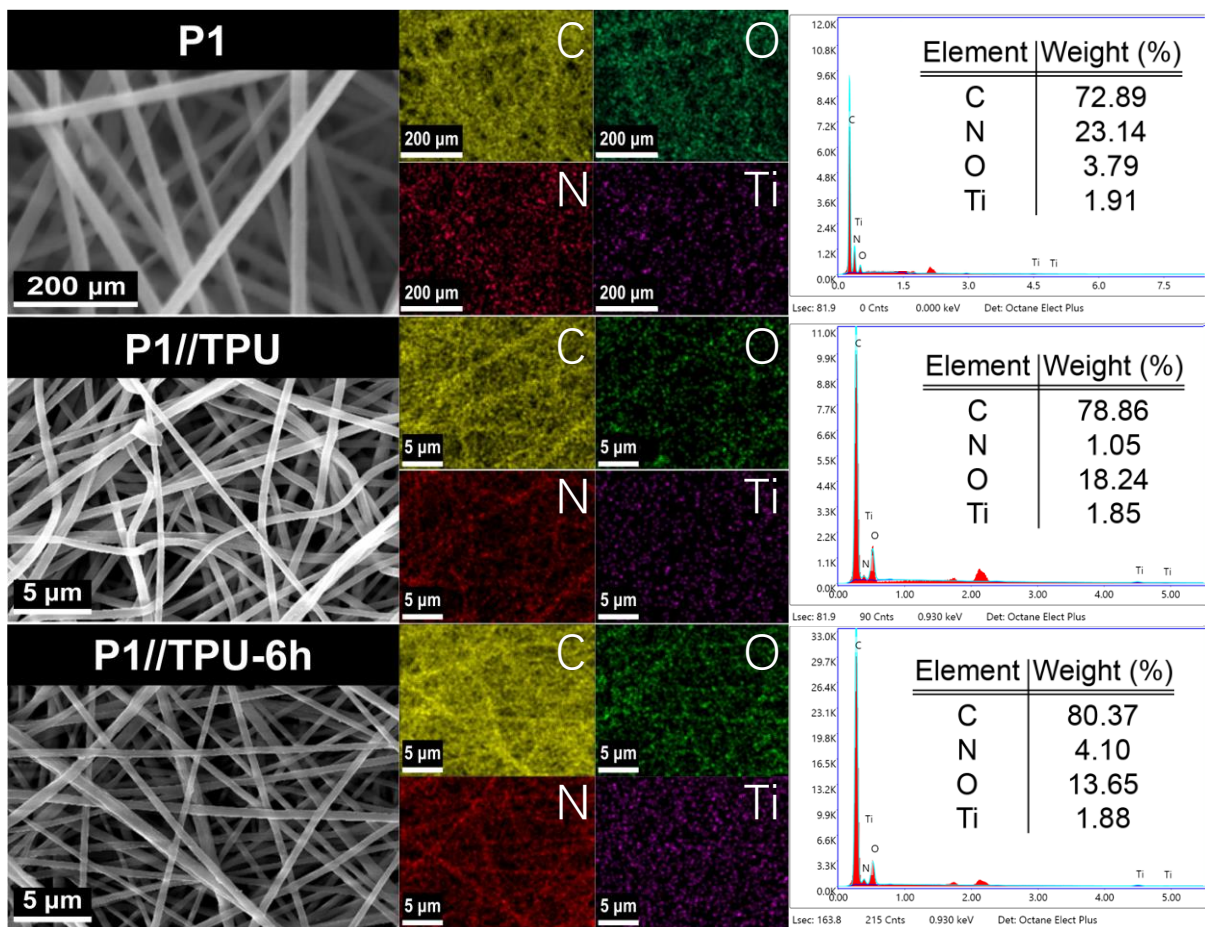

Fig. S6. EDS spectra of different fiber membranes.

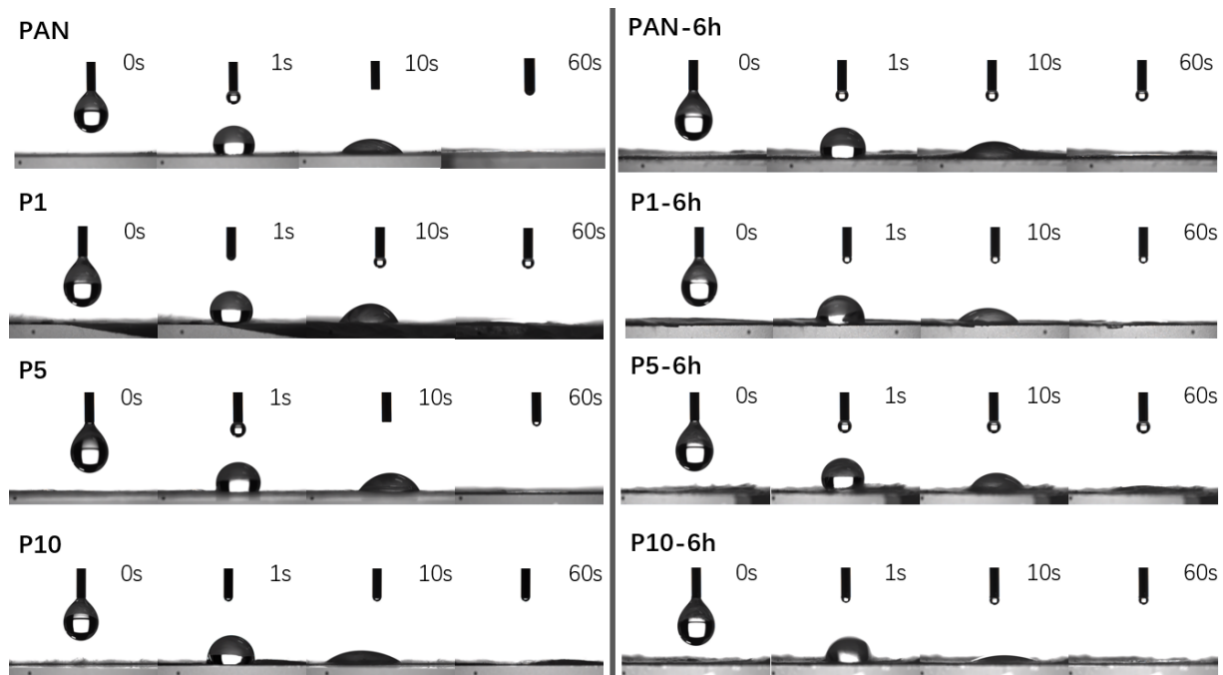

**Fig. S7.** The process of water contact angle change over 60 s for Px and Px-6h fiber membranes.

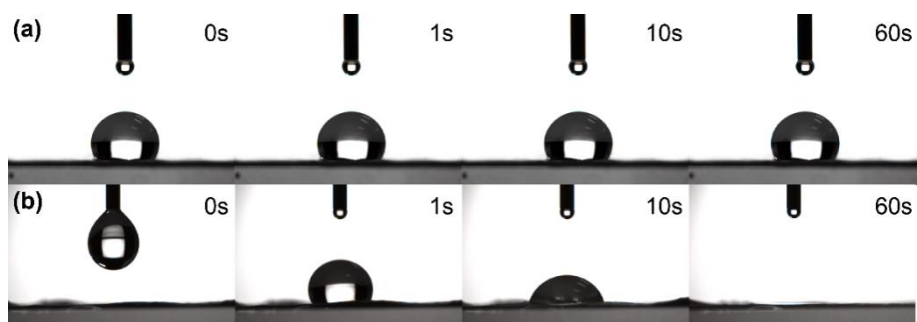

**Fig. S8.** Water contact angle change process:(a) TPU membrane; (b) TPU-6h membrane.

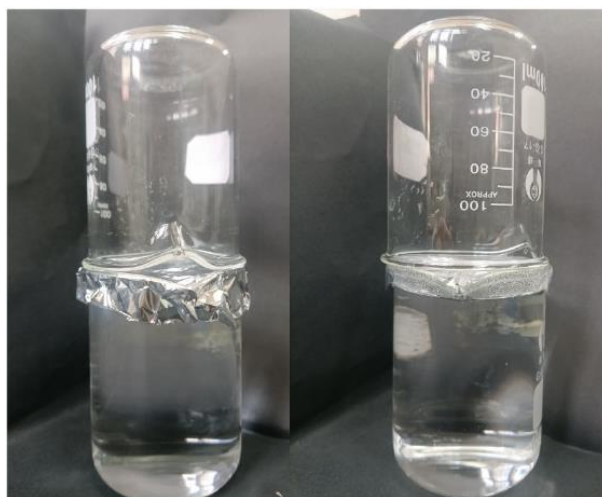

**Fig. S9.** Water vapor transmission: aluminum foil (left) and cling film (right).

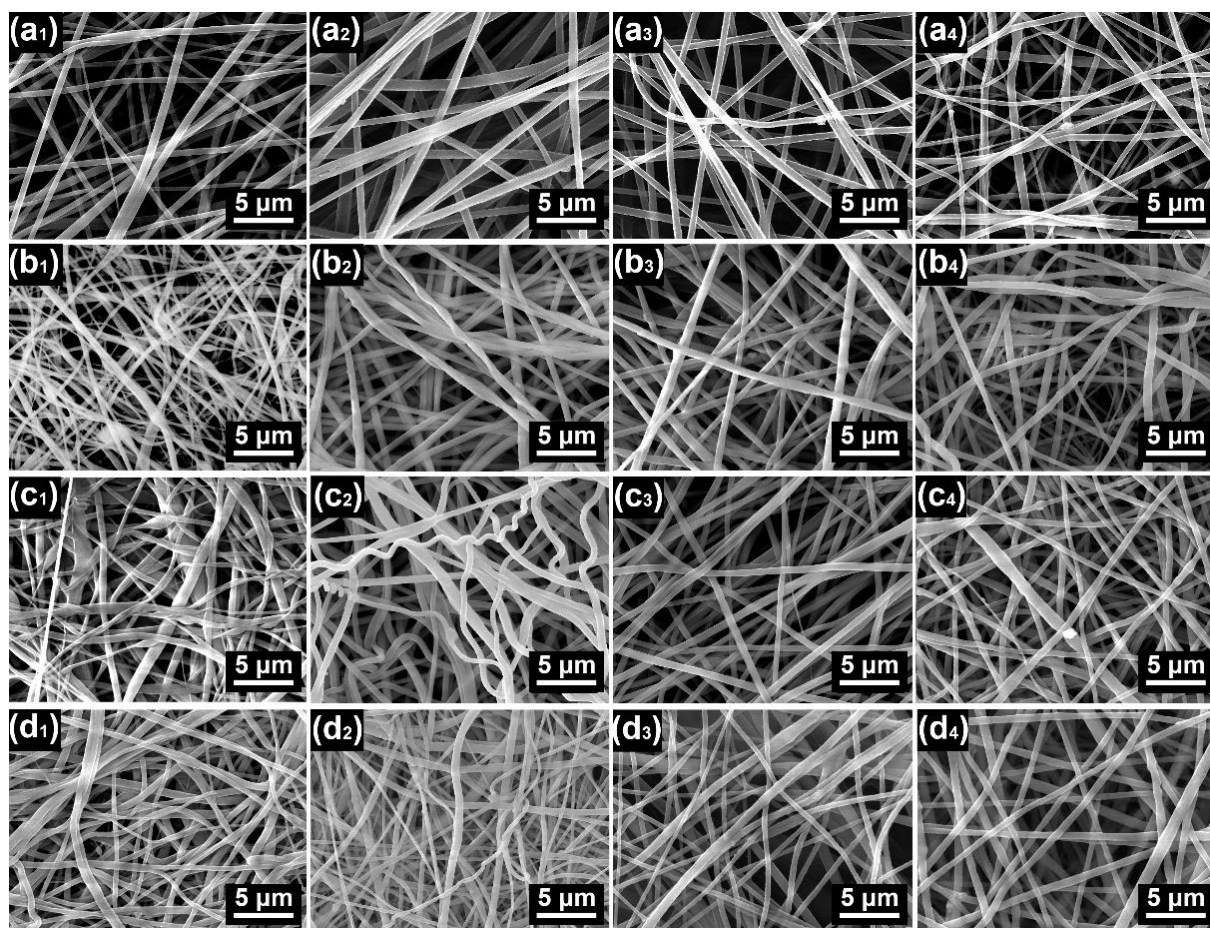

**Fig. S10.** (a) Original membranes, membranes after 7 d of immersion in (b) acid (pH = 1), (c) neutral (pH = 7), and (d) alkali (pH = 14) (1-4 correspond to the amount of 0,1,5,10 wt% TiO<sub>2</sub> added).

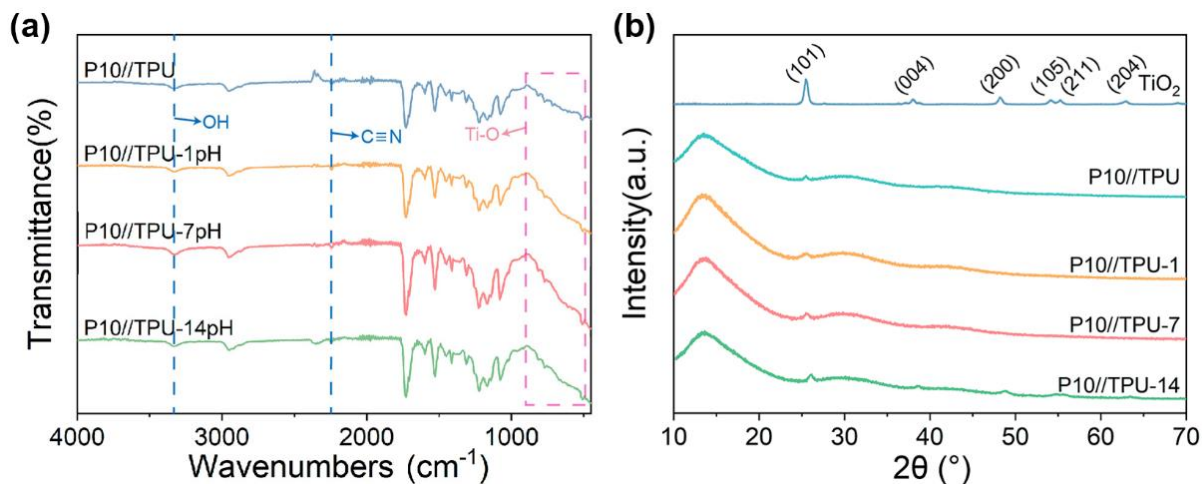

**Fig. S11.** (a) FTIR spectra; (b) XRD patterns of P10//TPU membranes after 7 d immersion in different pH values.

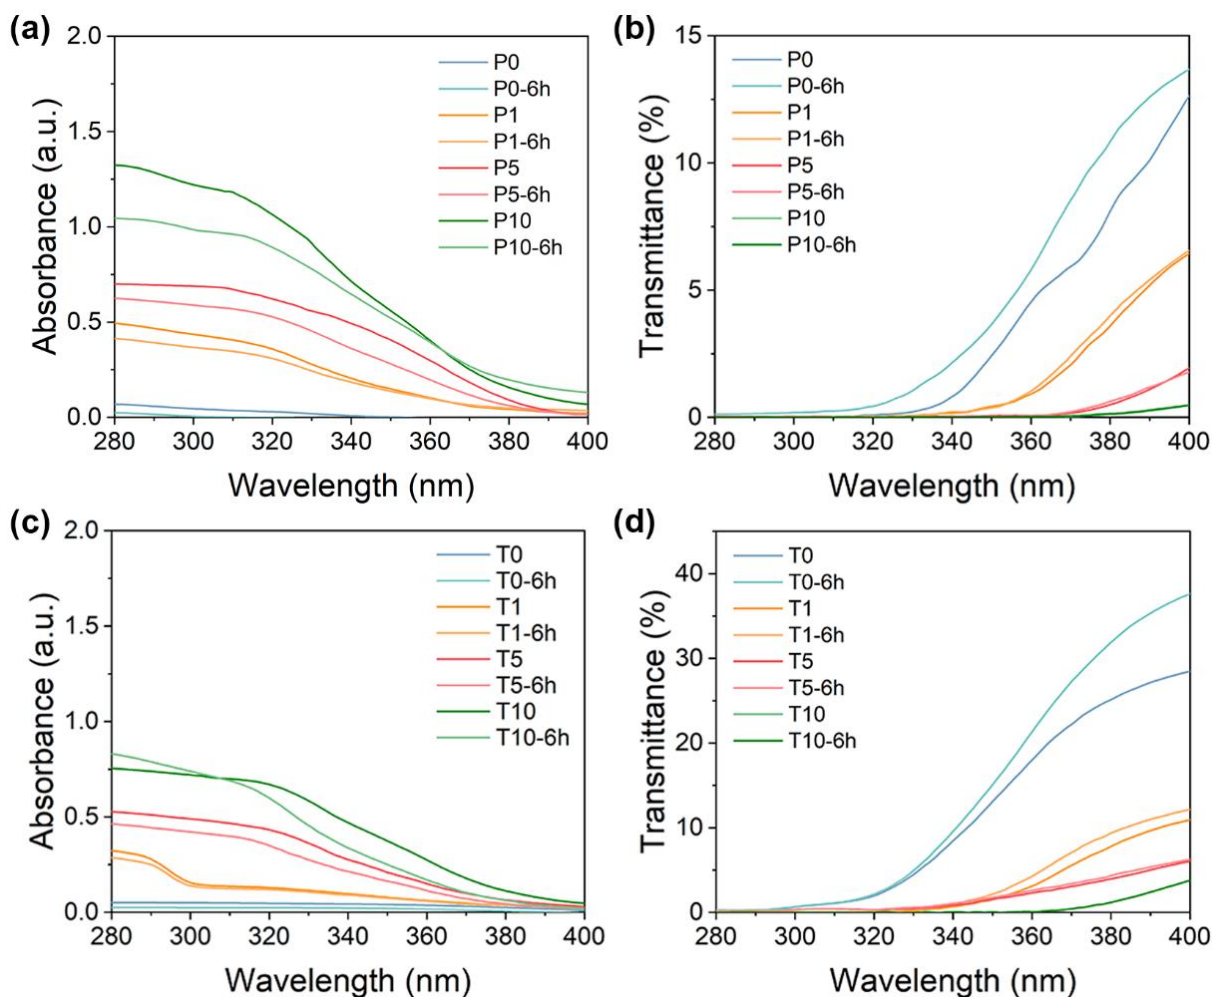

**Fig. S12.** UV absorption spectra and UV transmission spectra of membranes with different contents of  $\text{TiO}_2$  before and after xenon lamp irradiation:(a-b) PAN membranes; (c-d) TPU membranes.

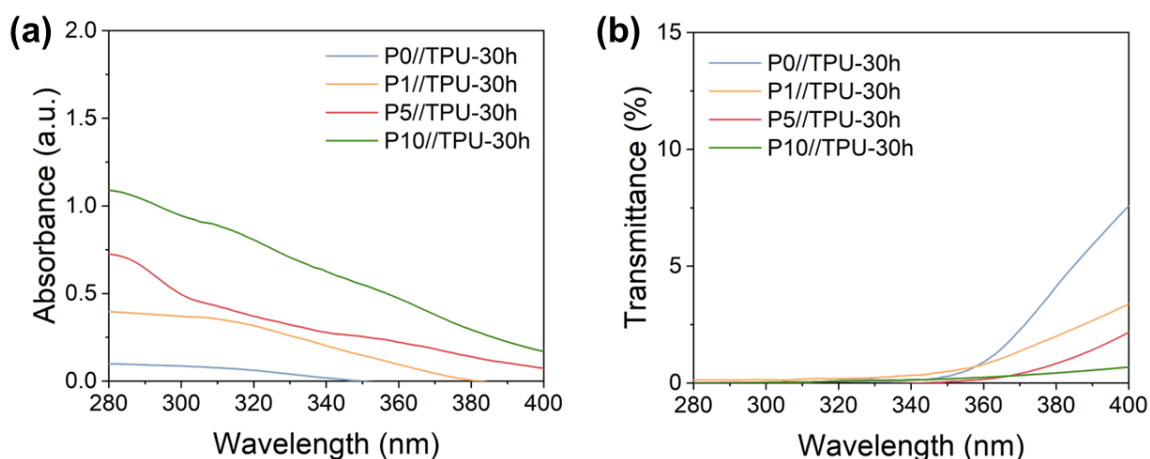

**Fig. S13.** (a) UV absorption spectra, and (b) UV transmission spectra of Py//TPU membranes after 30 h xenon lamp irradiation.

**Table S1:** Recent reports on UV resistant electrospinning nanofibers.

| Electrospinning methods   | Anti-UV additives                               | UPF                     | Mechanical Properties (MPa) | References |
|---------------------------|-------------------------------------------------|-------------------------|-----------------------------|------------|
| coaxial                   | zinc oxide (ZnO)                                | 86.21                   | 3                           | 1          |
| uniaxial                  | titanium (TiO <sub>2</sub> ), UV absorber (UV9) | 1690.7                  | 15.1                        | 2          |
| uniaxial                  | PDMS                                            | 185                     | /                           | 3          |
| uniaxial                  | UV absorber 329 (UV531), TiO <sub>2</sub>       | 1352                    | 7.6                         | 4          |
| double needle counter jet | ZnO                                             | 1117.67                 | /                           | 5          |
| uniaxial                  | UV531, TiO <sub>2</sub>                         | 1485                    | 14.6                        | 6          |
| uniaxial                  | lignin                                          | /                       | 1.07                        | 7          |
| uniaxial                  | Silver Nitrate (AgNO <sub>3</sub> )             | 100 (Equipment ceiling) | /                           | 8          |
| uniaxial                  | Pearl                                           | 968                     | /                           | 9          |



## REFERENCES

- 1 S. Wang, W. Chen, L. Wang, J. Yao, G. Zhu, B. Guo, J. Militky, M. Venkataraman and M. Zhang, *J. Ind. Eng. Chem.*, 2022, **108**, 449–455.
- 2 K. Liu, L. Deng, T. Zhang, K. Shen and X. Wang, *Ind. Eng. Chem. Res.*, 2020, **59**, 4447–4458.
- 3 J. Li, Y. Li, Y. Lu, W. Shi and H. Tian, *Biomimetics*, 2022, **7**, 217.
- 4 J. Sheng, S. Ding, H. Liao, Y. Yao, Y. Zhai, J. Zhan and X. Wang, *RSC Adv.*, 2023, **13**, 17622–17627.
- 5 H. Zhang, K. Li, C. Yao, J. Gu and X. Qin, *Colloids. Surf. A*, 2021, **629**, 127493.
- 6 Y. Xu, J. Sheng, X. Yin, J. Yu and B. Ding, *J. Colloid. Interf. Sci.*, 2017, **508**, 508–516.
- 7 J. Xu, W. Liu, J. Zhou, Y. Kong, M. Gong, M. Almajarsh, X. Zhao and X. Wang, *Ind. Crop. Prod.*, 2023, **203**, 117175.
- 8 T. Yan, S. Cao, Y. Shi, L. Huang, Y. Ou and R. H. Gong, *Molecules*, 2023, **28**, 6157.
- 9 M. Yu, Z. Chen, B. Xin, X. Liu and W. Xu, *Fibers Polym.*, 2022, **23**, 3022–3027.
